# Supplementary material for: Kinetics of Thermal Denaturation and Aggregation of Bovine Serum Albumin
Source: PubMed Central journal article supplement (PMC4839713; doi:10.1371/journal.pone.0153495), 2016-04-21
Supplement: pone.0153495.s002.pdf [file pone.0153495.s002.pdf]

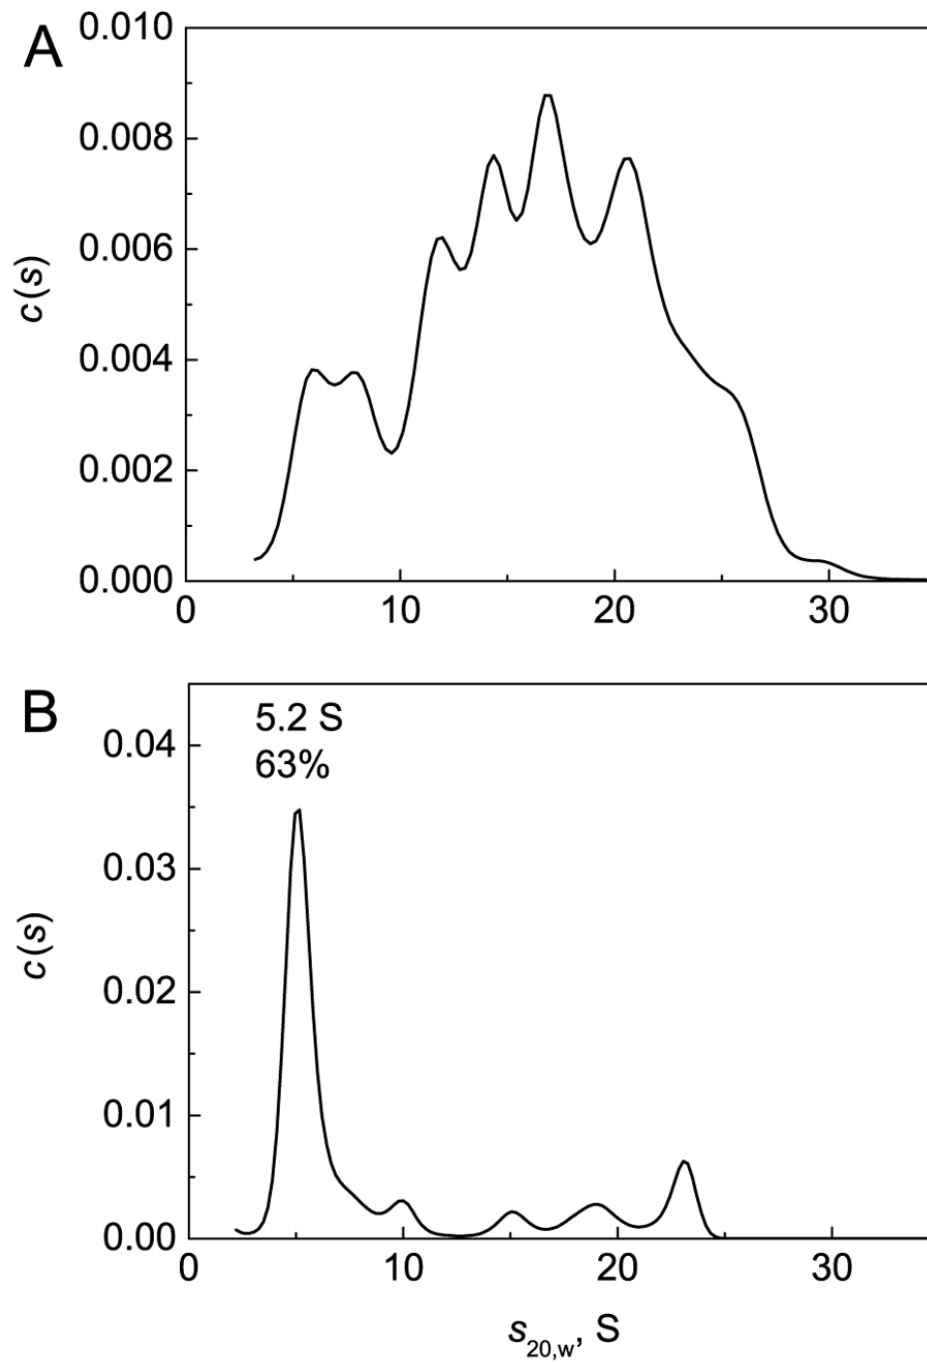

**S2 Fig.** Analytical ultracentrifugation of SEC-obtained fractions of BSA preheated for 12 h at 60 °C.
