# Supplementary material for: Kinetics of Thermal Denaturation and Aggregation of Bovine Serum Albumin
Source: PubMed Central journal article supplement (PMC4839713; doi:10.1371/journal.pone.0153495), 2016-04-21
Supplement: pone.0153495.s005.pdf [file pone.0153495.s005.pdf]

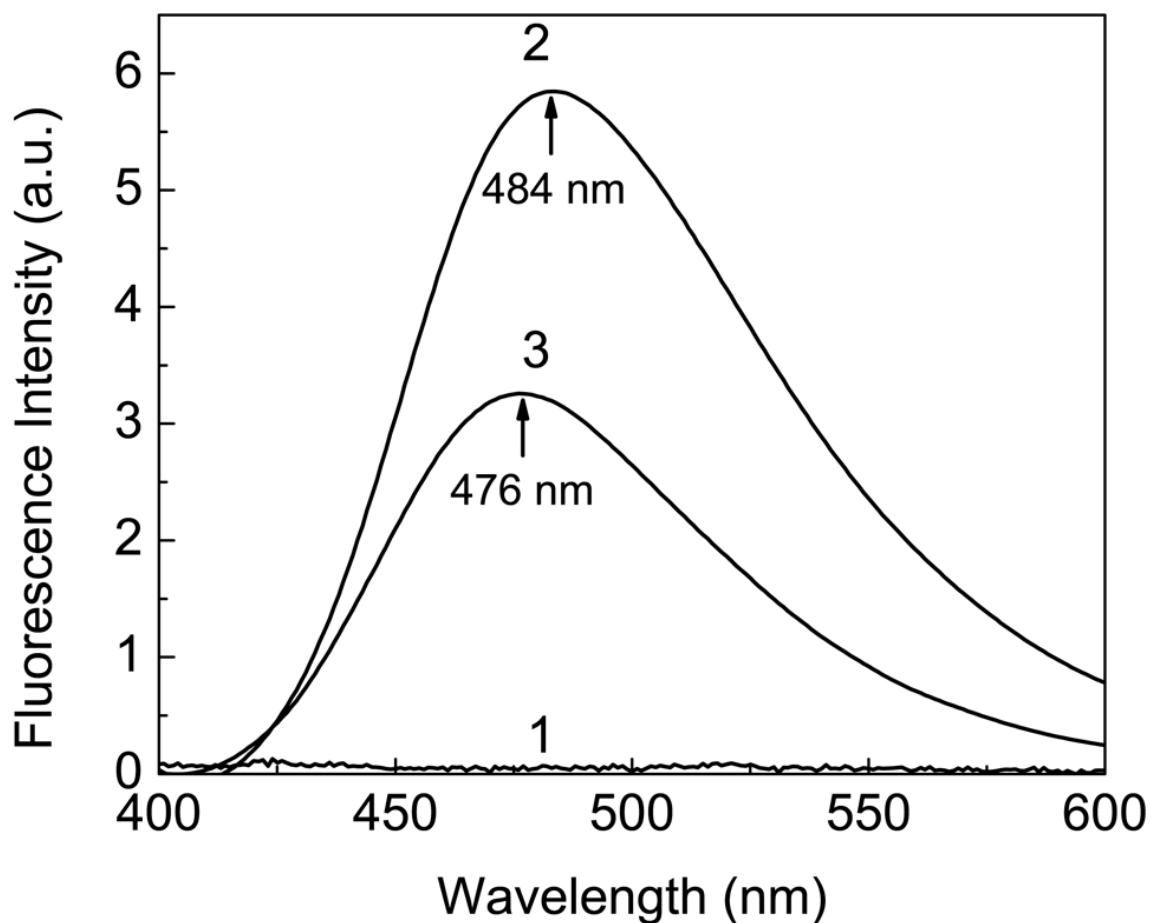

**S5 Fig. Fluorescence spectra of free ANS (10  $\mu$ M; curve 1), ANS (10  $\mu$ M) in the presence of intact BSA (0.1 mg/ml; curve 2) and ANS (10  $\mu$ M) in the presence of non-aggregated unfolded BSA (0.1 mg/ml; curve 3).**
