# Supplementary material for: Kinetics of Thermal Denaturation and Aggregation of Bovine Serum Albumin
Source: PubMed Central journal article supplement (PMC4839713; doi:10.1371/journal.pone.0153495), 2016-04-21
Supplement: pone.0153495.s006.pdf [file pone.0153495.s006.pdf]

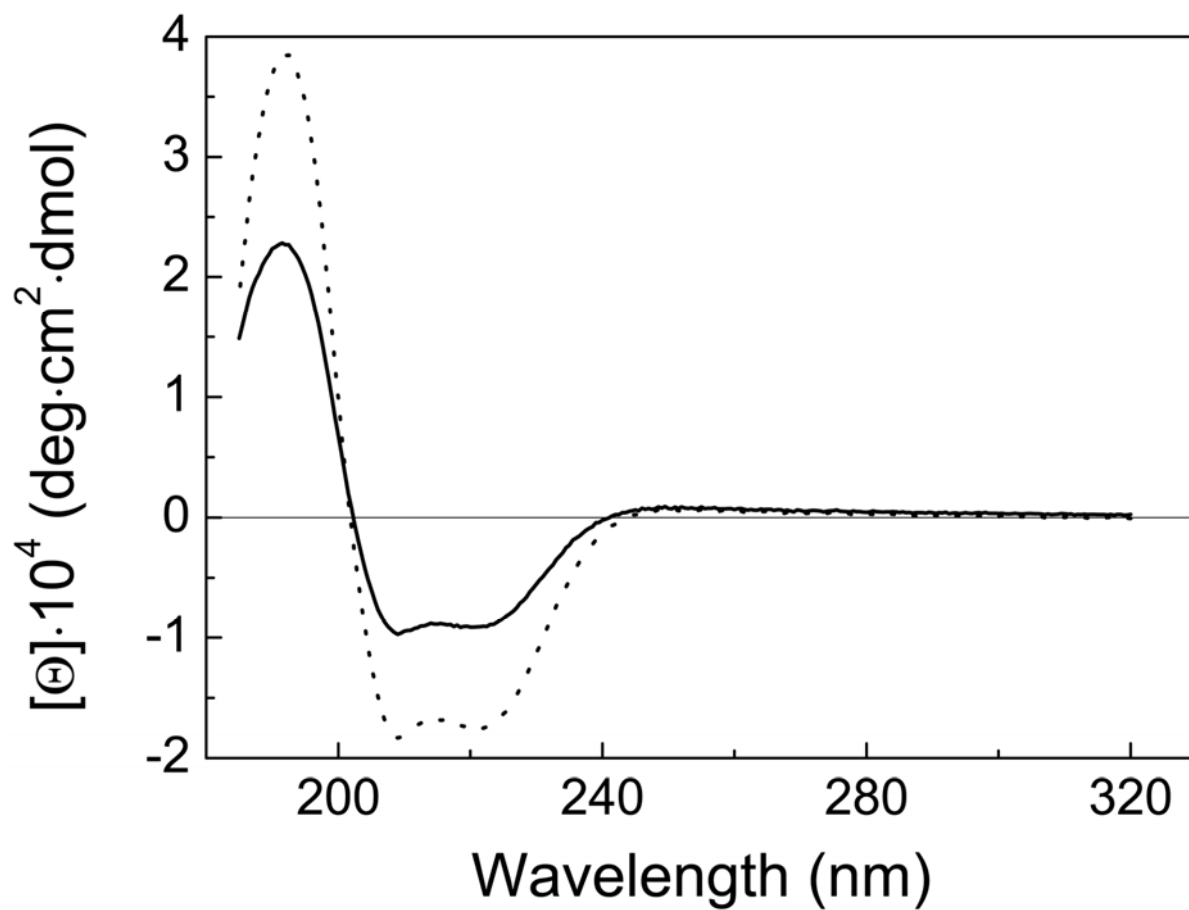

S6 Fig. CD spectra for intact BSA (dotted line) and non-aggregated unfolded BSA (solid curve).
