# Supplementary material for: Kinetics of Thermal Denaturation and Aggregation of Bovine Serum Albumin
Source: PubMed Central journal article supplement (PMC4839713; doi:10.1371/journal.pone.0153495), 2016-04-21
Supplement: pone.0153495.s007.pdf [file pone.0153495.s007.pdf]

**S1 Table. Secondary structure content calculated from CD spectra for native BSA and BSA preheated for 12 h.**

| <b>Secondary structure element</b> | <b><math>\alpha</math>-Helix</b> | <b><math>\beta</math>-Strand</b> | <b>Turns</b> | <b>Unordered</b> |
|------------------------------------|----------------------------------|----------------------------------|--------------|------------------|
| <b>CONTIN, Set 3</b>               |                                  |                                  |              |                  |
| <b>Native BSA</b>                  | 0.49                             | 0.11                             | 0.16         | 0.25             |
| <b>Unfolded non-aggregated BSA</b> | 0.31                             | 0.14                             | 0.18         | 0.31             |
| <b>SELCON, Set 3</b>               |                                  |                                  |              |                  |
| <b>Native BSA</b>                  | 0.49                             | 0.10                             | 0.16         | 0.25             |
| <b>Unfolded non-aggregated BSA</b> | 0.38                             | 0.16                             | 0.20         | 0.28             |
